# Supplementary material for: Altered amygdala and hippocampus effective connectivity in mild cognitive impairment patients with depression: a resting-state functional MR imaging study with granger causality analysis
Source: PubMed Central journal article supplement (PMC5421906; doi:10.18632/oncotarget.15335), 2017-02-15
Supplement: oncotarget-08-25021-s001.pdf [file oncotarget-08-25021-s001.pdf]

## Altered amygdala and hippocampus effective connectivity in mild cognitive impairment patients with depression: a resting-state functional MR imaging study with granger causality analysis

### SUPPLEMENTARY TABLES

**Supplementary Table 1: Correlation results between the altered effective connectivity of amygdala (R) - supplementary motor area (bilateral) and neuropsychological performances in aMCI-MDD and aMCI patients**

| Variables                   | MDD-aMCI |                    | aMCI   |                    |
|-----------------------------|----------|--------------------|--------|--------------------|
|                             | r        | P                  | r      | P                  |
| MMSE/30                     | -0.120   | 0.710 <sup>e</sup> | 0.036  | 0.908 <sup>e</sup> |
| MOCA/30                     | -0.098   | 0.714 <sup>d</sup> | -0.058 | 0.847 <sup>d</sup> |
| AVLT-immediate learning (n) | -0.087   | 0.789 <sup>e</sup> | 0.070  | 0.820 <sup>e</sup> |
| AVLT-delayed recall (n)     | 0.029    | 0.931 <sup>d</sup> | -0.001 | 0.886 <sup>d</sup> |
| AVLT-recognition (n)        | 0.093    | 0.771 <sup>d</sup> | 0.118  | 0.698 <sup>d</sup> |
| CDT (score)                 | -0.150   | 0.396 <sup>d</sup> | 0.308  | 0.305 <sup>d</sup> |

<sup>d</sup> Spearman rank correlation; <sup>e</sup> Pearson correlation;

MDD-aMCI = Major Depression Disorder and Amnesic Mild Cognitive Impairment; aMCI = Amnesic Mild Cognitive Impairment.

n = number; MMSE = Mini-Mental State Examination; MoCA = Montreal Cognitive Assessment; AVLT = Auditory Verbal Learning Test (AVLT); CDT = Clock Drawing Test.

**Supplementary Table 2: Correlation results between the altered effective connectivity of amygdala (R) – lingual and calcarine gyrus (R) and neuropsychological performances in aMCI-MDD and aMCI patients**

| Variables                   | MDD-aMCI |                    | aMCI   |                    |
|-----------------------------|----------|--------------------|--------|--------------------|
|                             | r        | P                  | r      | P                  |
| MMSE/30                     | 0.147    | 0.647 <sup>e</sup> | -0.190 | 0.534 <sup>e</sup> |
| MOCA/30                     | 0.046    | 0.890 <sup>d</sup> | -0.220 | 0.461 <sup>d</sup> |
| AVLT-immediate learning (n) | -0.572   | 0.052 <sup>e</sup> | 0.189  | 0.537 <sup>e</sup> |
| AVLT-delayed recall (n)     | 0.126    | 0.694 <sup>d</sup> | 0.020  | 0.951 <sup>d</sup> |
| AVLT-recognition (n)        | 0.345    | 0.271 <sup>d</sup> | 0.033  | 0.916 <sup>d</sup> |
| CDT (score)                 | -0.094   | 0.509 <sup>d</sup> | 0.253  | 0.246 <sup>d</sup> |

<sup>d</sup> Spearman rank correlation; <sup>e</sup> Pearson correlation;

MDD-aMCI = Major Depression Disorder and Amnesic Mild Cognitive Impairment; aMCI = Amnesic Mild Cognitive Impairment.

n = number; MMSE = Mini-Mental State Examination; MoCA = Montreal Cognitive Assessment; AVLT = Auditory Verbal Learning Test (AVLT); CDT = Clock Drawing Test.

**Supplementary Table 3: Correlation results between the altered effective connectivity of hippocampus (L) – superior parietal gyrus and superior and middle occipital gyrus (L) and neuropsychological performances in aMCI-MDD and aMCI patients**

| Variables                   | aMCI-MDD      |                           | MCI    |                    |
|-----------------------------|---------------|---------------------------|--------|--------------------|
|                             | r             | P                         | r      | P                  |
| MMSE/30                     | <b>0.594</b>  | <b>0.042<sup>e*</sup></b> | -0.354 | 0.235 <sup>e</sup> |
| MOCA/30                     | 0.077         | 0.813 <sup>d</sup>        | -0.006 | 0.982 <sup>d</sup> |
| AVLT-immediate learning (n) | <b>-0.626</b> | <b>0.029<sup>e*</sup></b> | -0.334 | 0.264 <sup>e</sup> |
| AVLT-delayed recall (n)     | 0.436         | 0.157 <sup>d</sup>        | -0.210 | 0.423 <sup>d</sup> |
| AVLT-recognition (n)        | 0.041         | 0.899 <sup>d</sup>        | -0.268 | 0.373 <sup>d</sup> |
| CDT (score)                 | 0.265         | 0.406 <sup>d</sup>        | -0.148 | 0.427 <sup>d</sup> |

<sup>d</sup> Spearman rank correlation; <sup>e</sup> Pearson correlation;

\* P < 0.05;

n = number; MMSE = Mini-Mental State Examination; MoCA = Montreal Cognitive Assessment; AVLT = Auditory Verbal Learning Test (AVLT); CDT = Clock Drawing Test.
